# Supplementary material
Source: PubMed Central journal article supplement (PMC2927798)

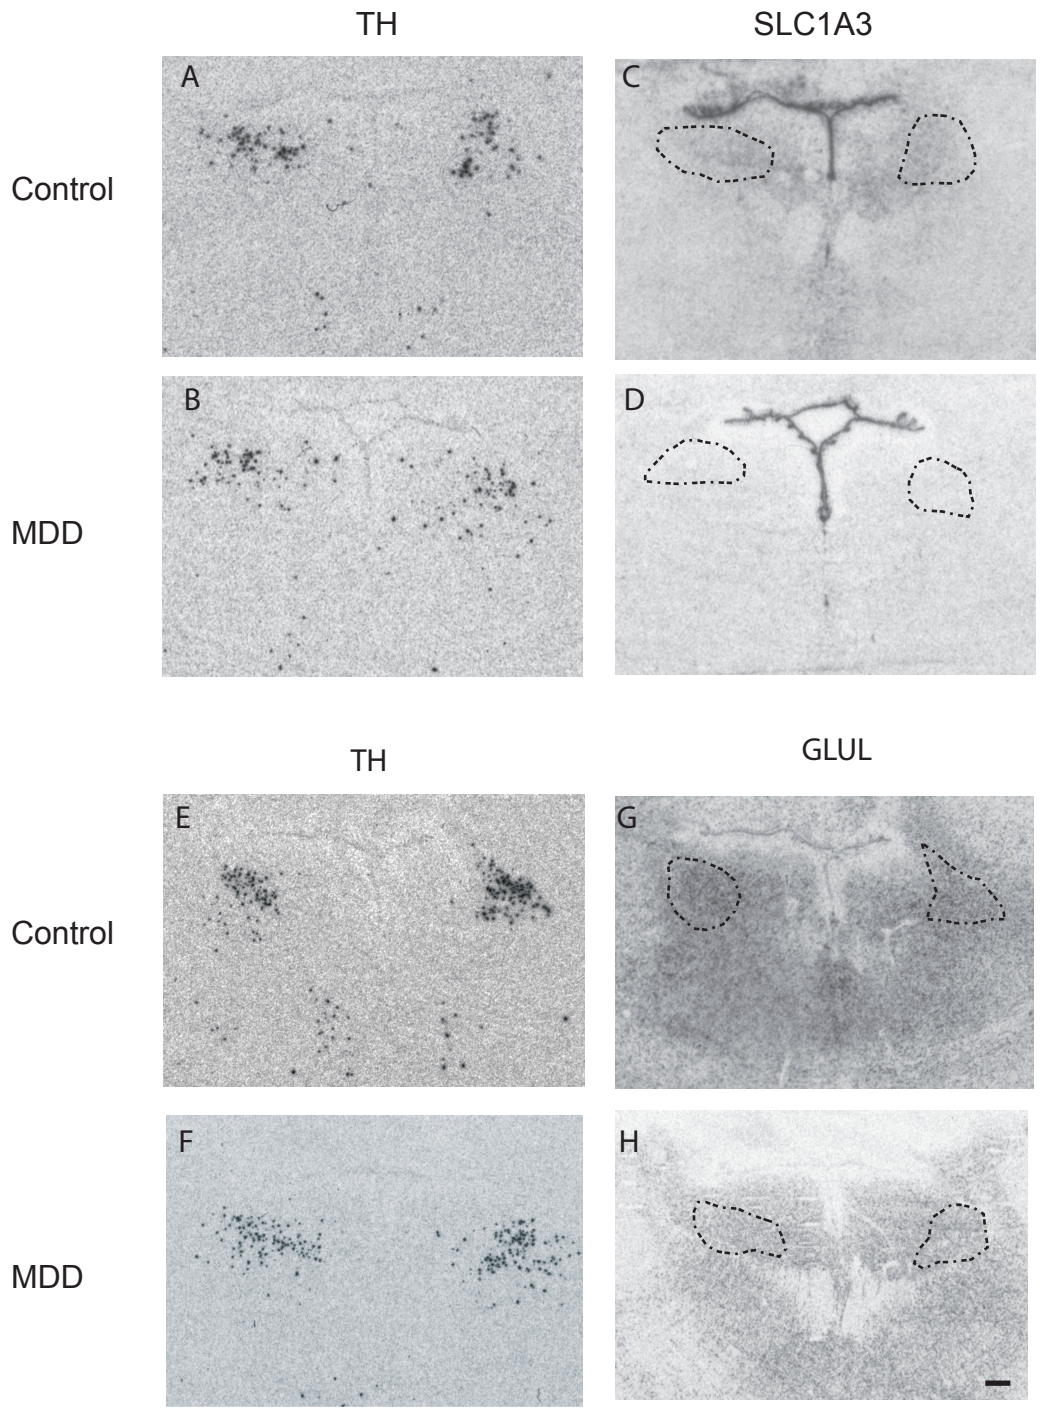

Supplement: NIHMS185914-supplement-1.pdf [file NIHMS185914-supplement-1.pdf]

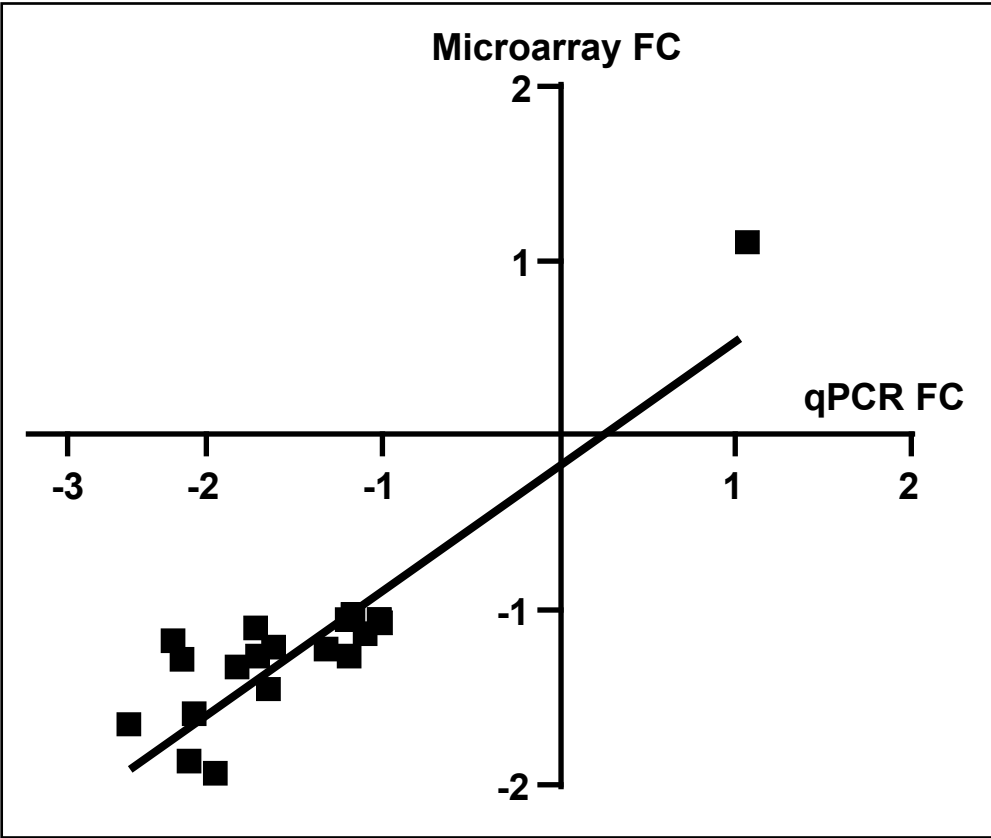

Supplement: NIHMS185914-supplement-2.pdf [file NIHMS185914-supplement-2.pdf]
